# Supplementary material for: Efficient photocathode performance of lithium ion doped LaFeO3 nanorod arrays in hydrogen evolution
Source: Royal Society of Chemistry journal article supplement (doi:10.1039/d0nj05788f), 2021-01-01
Supplement: d0nj05788f1.pdf [file d0nj05788f1.pdf]

## Efficient photocathode performance of Lithium ions doped $\text{LaFeO}_3$ nanorod array for hydrogen evolution

Yang Li,<sup>a</sup> Tao Wang,<sup>\*a</sup> Bin Gao,<sup>a</sup> Xiaoli Fan,<sup>b</sup> Hao Gong,<sup>a</sup> Hairong Xue,<sup>a</sup> Songtao Zhang,<sup>c</sup> Xianli Huang,<sup>a</sup> Jianping He,<sup>\*a</sup>

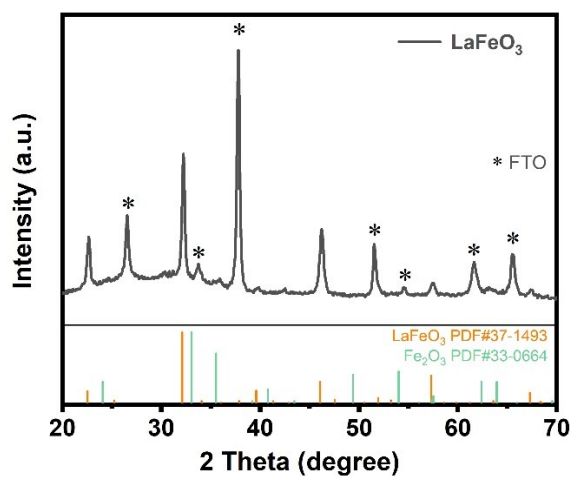

Figure S1. XRD pattern of  $\text{LaFeO}_3$  film.

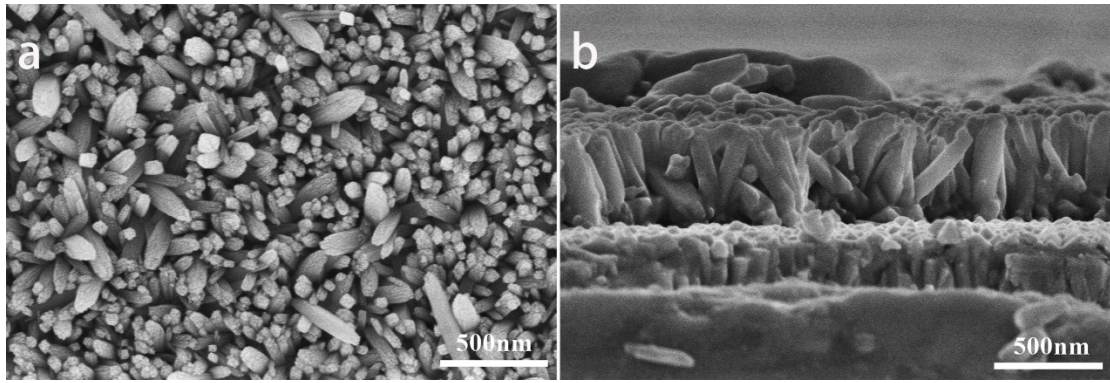

Figure S2. The top-view SEM images (a) and cross-view SEM (b) of  $\beta$ -FeOOH.

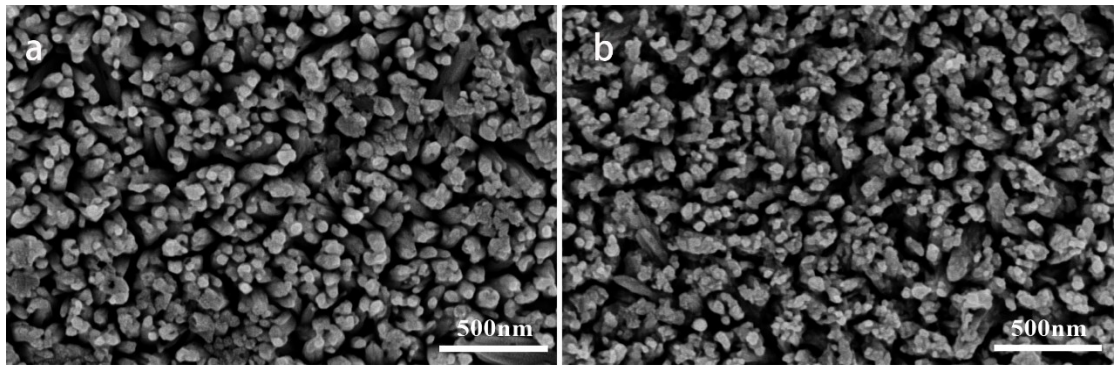

Figure S3. The top SEM images of (a) Li-LFO-1 and (b) Li-LFO-3.

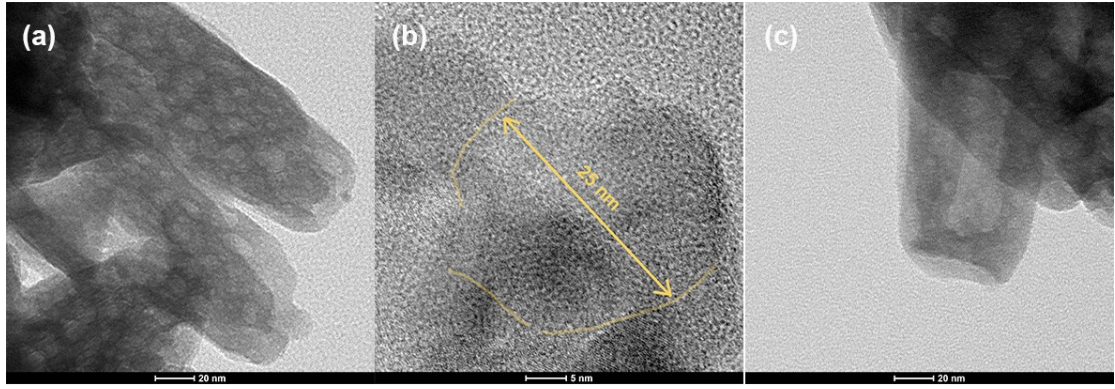

Figure S4. The HR-TEM images of (a)(b) pristine  $\text{LaFeO}_3$  and (c) Li-doped  $\text{LaFeO}_3$ .

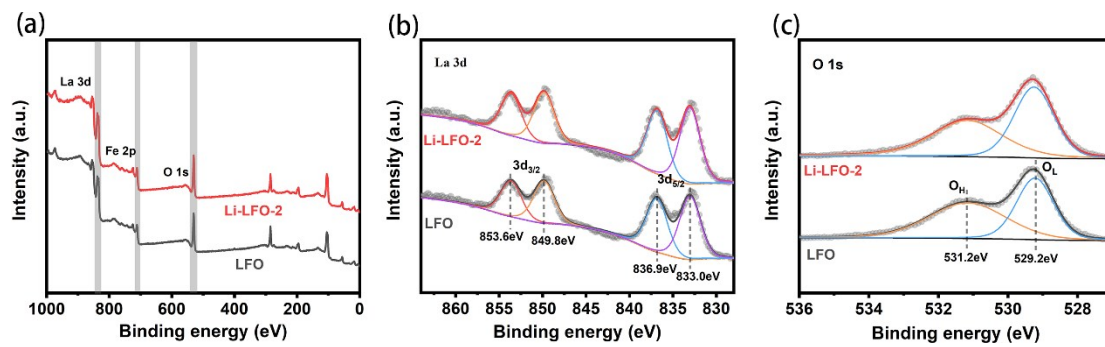

Figure S5. XPS survey spectra (a) and high-resolution of La 3d (b), O 1s (c).

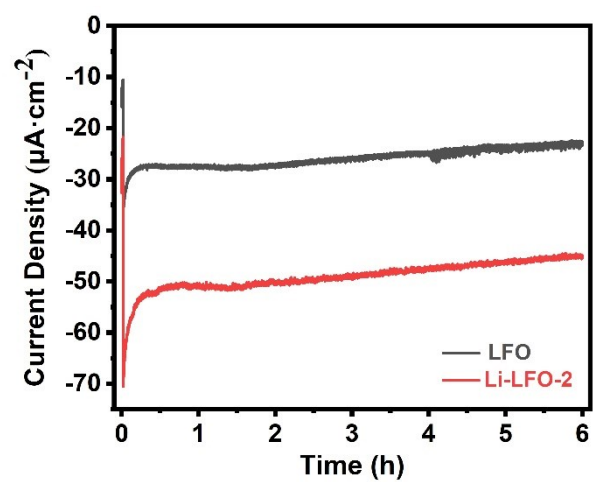

Figure S6. The chopped I-t curves at 0.4V vs. RHE for pristine and Li-doped  $\text{LaFeO}_3$  for water reduction with  $\text{N}_2$  bubbling.

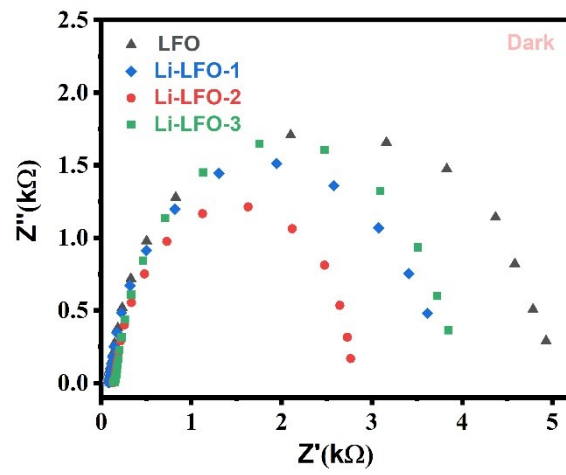

Figure S7. The EIS curves in light of pristine and Li-doped  $\text{LaFeO}_3$  photocathodes measured in a solution saturated with  $\text{O}_2$ .

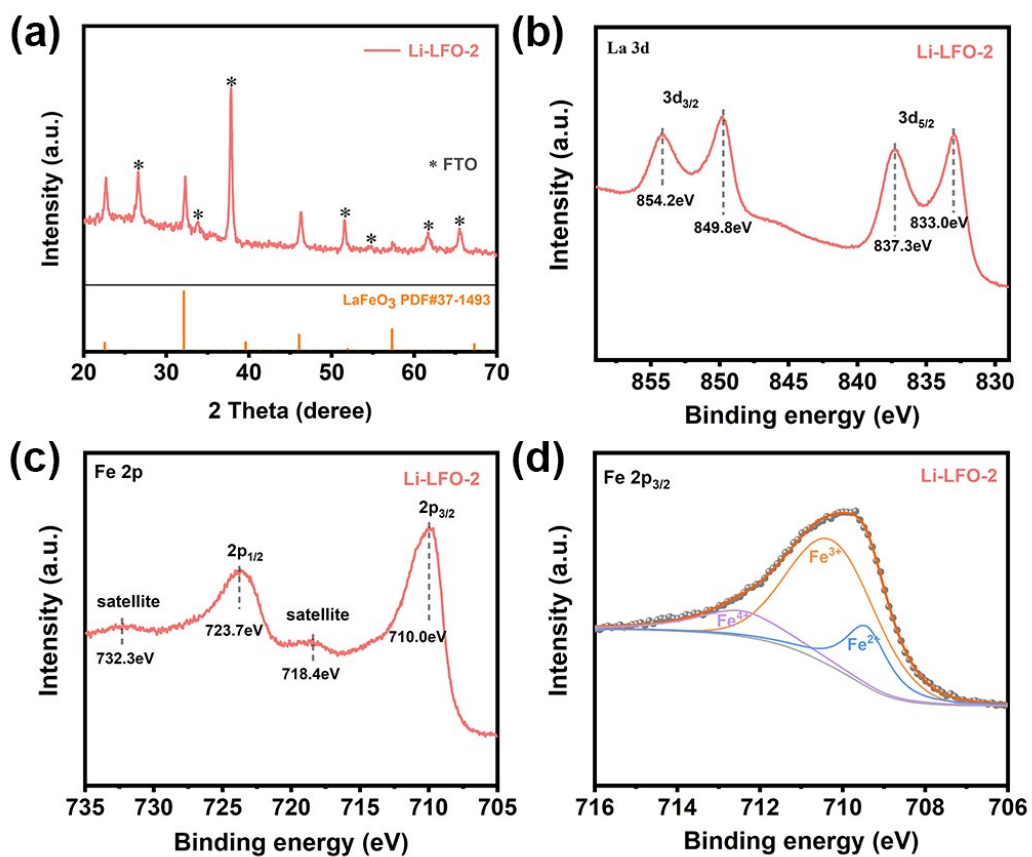

Figure S8. (a) XRD spectra, (b) XPS high-resolution spectra of La 3d, (c) XPS high-resolution spectra of Fe 2p and (d) peak fitting of Fe 2p<sub>3/2</sub> of Li-LFO-2 photocathode.



Table S1. The crystallite size calculated based on XRD information

| <b>hkl</b> | <b>2θ(°)</b> | <b>β(rad)</b> | <b>D (nm)</b> | <b>Average<br/>crystallite size</b> |
|------------|--------------|---------------|---------------|-------------------------------------|
| (101)      | 22.660       | 0.380         | 22.34         | 22.10 nm                            |
| (121)      | 32.240       | 0.326         | 26.58         |                                     |
| (202)      | 46.200       | 0.448         | 20.20         |                                     |
| (240)      | 57.539       | 0.493         | 19.26         |                                     |

$$D_{hkl} = \frac{K\lambda}{\beta \frac{\pi}{180} \cdot \cos \theta}$$

Debye-Scherrer :

$D_{hkl}$  is the grain diameter perpendicular to the crystal plane (hkl) direction. K is the Scherrer constant, and  $K = 0.943$  (*cube grain*).  $\lambda$  is the incident X-ray wavelength, and  $\lambda = 0.15406 \text{ nm}$  (*Cu Kα*).  $\theta$  is the Bragg diffraction angle.  $\beta$  is the half-width of the diffraction peak.

Table S2. LiNO<sub>3</sub> drop-cast solution concentrations and percentages of Lithium in the LaFeO<sub>3</sub> film

| concentration of Li in drop-cast solution | atomic % of Li in LaFeO <sub>3</sub> |
|-------------------------------------------|--------------------------------------|
| 0.5 mM                                    | 0.75%                                |
| 1.0 mM                                    | 3.8%                                 |
| 1.5 mM                                    | 5.7%                                 |

Table S3. The photocurrents of the LaFeO<sub>3</sub> photocathodes for PEC water reduction in the literature.

| Photocathode and modification | Preparation                  | Potential       | Current density                      | Reference |
|-------------------------------|------------------------------|-----------------|--------------------------------------|-----------|
| LaFeO <sub>3</sub>            | Electrodeposition            | 0.4 V (vs. RHE) | -10 $\mu$ A $\cdot$ cm <sup>-2</sup> | 1         |
| LaFeO <sub>3</sub>            | magnetron sputtering         | 0 V (vs. RHE)   | -25 $\mu$ A $\cdot$ cm <sup>-2</sup> | 2         |
| (NiP+P1*)@ LaFeO <sub>3</sub> | spray pyrolysis              | 0.6 V (vs. RHE) | -20 $\mu$ A $\cdot$ cm <sup>-2</sup> | 3         |
| Au/ LaFeO <sub>3</sub>        | sol-gel                      | 0.6 V (vs. RHE) | -20 $\mu$ A $\cdot$ cm <sup>-2</sup> | 4         |
| Ni-LaFeO <sub>3</sub>         | spray pyrolysis              | 0.6 V (vs. RHE) | -66 $\mu$ A $\cdot$ cm <sup>-2</sup> | 5         |
| Li- LaFeO <sub>3</sub>        | Hydrothermal template method | 0.4 V (vs. RHE) | -50 $\mu$ A $\cdot$ cm <sup>-2</sup> | This work |

## Reference

- [1] G. P. Wheeler, V. U. Baltazar, T. J. Smart, A. Radmilovic, Y. Ping, K. S. Choi, *Chem. Mater.*, 2019,**31**,5890-5899.
- [2] M. K. Son, H. Seo, M. Watanabe, M. Shiratani, T. Ishihara, *Nanoscale*, 2020,**12**,9653-9660.
- [3] F. Li, R. Xu, C. Nie, X. Wu, P. Zhang, L. Duan, L. Sun, *Chem. Commun.*, 2019,**55**, 12940-12943
- [4] P. Wang, Y. He, Y. Mi, J. Zhu, F. Zhang, Y. Liu, Y. Yang, M. Chen, D. Cao, *RSC Adv.*, 2019,**9**, 26780-26786
- [5] G. S. Pawar, A. Elikkottil, B. Pesala, A. A. Tahir, T. K. Mallick, *Int. J. Hydrog. Energy*, 2019,**44**,578-586
